# Supplementary material
Source: publisher figshare collection journal article supplement (https://gsajournals.figshare.com/ndownloader/files/25333766)
Supplement: Supplementary file 1 [file 25333766]

# description: C_albicans_SC5314_version_A22-s07-m01-r27 gtf with potential novel genes only
# format: gtf
# created: 17 July, 2020
# source: Global Translational Landscape of the Candida albicans Morphological Transition - Vasanthakrisha Mundodi*, Saket Choudhary*, Andrew D. Smith and David Kadosh (MSCK_2020)
Ca22chr1A_C_albicans_SC5314	MSCK_2020	exon	1283	1555	.	-	0	transcript_id "MSTRG.1.1"; gene_id "MSTRG.1"; gene_name "MSTRG.1"; transcript_type "novel"; gene_type "novel";
Ca22chr1A_C_albicans_SC5314	MSCK_2020	exon	1633	2551	.	+	0	transcript_id "MSTRG.2.1"; gene_id "MSTRG.2"; gene_name "MSTRG.2"; transcript_type "novel"; gene_type "novel";
Ca22chr1A_C_albicans_SC5314	MSCK_2020	exon	4731	5343	.	-	0	transcript_id "MSTRG.6.1"; gene_id "MSTRG.6"; gene_name "MSTRG.6"; transcript_type "novel"; gene_type "novel";
Ca22chr1A_C_albicans_SC5314	MSCK_2020	exon	404412	404945	.	+	0	transcript_id "MSTRG.182.1"; gene_id "MSTRG.182"; gene_name "MSTRG.182"; transcript_type "novel"; gene_type "novel";
Ca22chr1A_C_albicans_SC5314	MSCK_2020	exon	1096229	1096572	.	+	0	transcript_id "MSTRG.476.1"; gene_id "MSTRG.476"; gene_name "MSTRG.476"; transcript_type "novel"; gene_type "novel";
Ca22chr1A_C_albicans_SC5314	MSCK_2020	exon	1158413	1158649	.	-	0	transcript_id "MSTRG.509.1"; gene_id "MSTRG.509"; gene_name "MSTRG.509"; transcript_type "novel"; gene_type "novel";
Ca22chr1A_C_albicans_SC5314	MSCK_2020	exon	1249735	1250141	.	+	0	transcript_id "MSTRG.553.1"; gene_id "MSTRG.553"; gene_name "MSTRG.553"; transcript_type "novel"; gene_type "novel";
Ca22chr1A_C_albicans_SC5314	MSCK_2020	exon	1966853	1966976	.	-	0	transcript_id "MSTRG.835.1"; gene_id "MSTRG.835"; gene_name "MSTRG.835"; transcript_type "novel"; gene_type "novel";
Ca22chr1A_C_albicans_SC5314	MSCK_2020	exon	1967256	1967341	.	-	0	transcript_id "MSTRG.835.1"; gene_id "MSTRG.835"; gene_name "MSTRG.835"; transcript_type "novel"; gene_type "novel";
Ca22chr1A_C_albicans_SC5314	MSCK_2020	exon	2252561	2252846	.	-	0	transcript_id "MSTRG.944.1"; gene_id "MSTRG.944"; gene_name "MSTRG.944"; transcript_type "novel"; gene_type "novel";
Ca22chr1B_C_albicans_SC5314	MSCK_2020	exon	512144	512376	.	-	0	transcript_id "MSTRG.1494.1"; gene_id "MSTRG.1494"; gene_name "MSTRG.1494"; transcript_type "novel"; gene_type "novel";
Ca22chr1B_C_albicans_SC5314	MSCK_2020	exon	1318641	1318855	.	-	0	transcript_id "MSTRG.1841.1"; gene_id "MSTRG.1841"; gene_name "MSTRG.1841"; transcript_type "novel"; gene_type "novel";
Ca22chr1B_C_albicans_SC5314	MSCK_2020	exon	1673384	1673583	.	+	0	transcript_id "MSTRG.1980.1"; gene_id "MSTRG.1980"; gene_name "MSTRG.1980"; transcript_type "novel"; gene_type "novel";
Ca22chr1B_C_albicans_SC5314	MSCK_2020	exon	2326419	2326823	.	-	0	transcript_id "MSTRG.2209.1"; gene_id "MSTRG.2209"; gene_name "MSTRG.2209"; transcript_type "novel"; gene_type "novel";
Ca22chr2A_C_albicans_SC5314	MSCK_2020	exon	1	268	.	+	0	transcript_id "MSTRG.2510.1"; gene_id "MSTRG.2510"; gene_name "MSTRG.2510"; transcript_type "novel"; gene_type "novel";
Ca22chr2A_C_albicans_SC5314	MSCK_2020	exon	84	812	.	-	0	transcript_id "MSTRG.2511.1"; gene_id "MSTRG.2511"; gene_name "MSTRG.2511"; transcript_type "novel"; gene_type "novel";
Ca22chr2A_C_albicans_SC5314	MSCK_2020	exon	450787	451013	.	+	0	transcript_id "MSTRG.2713.1"; gene_id "MSTRG.2713"; gene_name "MSTRG.2713"; transcript_type "novel"; gene_type "novel";
Ca22chr2A_C_albicans_SC5314	MSCK_2020	exon	1497885	1498263	.	-	0	transcript_id "MSTRG.3162.1"; gene_id "MSTRG.3162"; gene_name "MSTRG.3162"; transcript_type "novel"; gene_type "novel";
Ca22chr2A_C_albicans_SC5314	MSCK_2020	exon	1886000	1886389	.	-	0	transcript_id "MSTRG.3336.1"; gene_id "MSTRG.3336"; gene_name "MSTRG.3336"; transcript_type "novel"; gene_type "novel";
Ca22chr2A_C_albicans_SC5314	MSCK_2020	exon	1886495	1886520	.	-	0	transcript_id "MSTRG.3336.1"; gene_id "MSTRG.3336"; gene_name "MSTRG.3336"; transcript_type "novel"; gene_type "novel";
Ca22chr2A_C_albicans_SC5314	MSCK_2020	exon	1886620	1886844	.	-	0	transcript_id "MSTRG.3336.1"; gene_id "MSTRG.3336"; gene_name "MSTRG.3336"; transcript_type "novel"; gene_type "novel";
Ca22chr2A_C_albicans_SC5314	MSCK_2020	exon	1914958	1915175	.	-	0	transcript_id "MSTRG.3355.1"; gene_id "MSTRG.3355"; gene_name "MSTRG.3355"; transcript_type "novel"; gene_type "novel";
Ca22chr2A_C_albicans_SC5314	MSCK_2020	exon	2229206	2229767	.	-	0	transcript_id "MSTRG.3486.1"; gene_id "MSTRG.3486"; gene_name "MSTRG.3486"; transcript_type "novel"; gene_type "novel";
Ca22chr2A_C_albicans_SC5314	MSCK_2020	exon	2231578	2231838	.	+	0	transcript_id "MSTRG.3487.1"; gene_id "MSTRG.3487"; gene_name "MSTRG.3487"; transcript_type "novel"; gene_type "novel";
Ca22chr2B_C_albicans_SC5314	MSCK_2020	exon	2063577	2063814	.	-	0	transcript_id "MSTRG.4003.1"; gene_id "MSTRG.4003"; gene_name "MSTRG.4003"; transcript_type "novel"; gene_type "novel";
Ca22chr3A_C_albicans_SC5314	MSCK_2020	exon	2169	3818	.	+	0	transcript_id "MSTRG.4032.1"; gene_id "MSTRG.4032"; gene_name "MSTRG.4032"; transcript_type "novel"; gene_type "novel";
Ca22chr3A_C_albicans_SC5314	MSCK_2020	exon	1479997	1480373	.	-	0	transcript_id "MSTRG.4628.1"; gene_id "MSTRG.4628"; gene_name "MSTRG.4628"; transcript_type "novel"; gene_type "novel";
Ca22chr3A_C_albicans_SC5314	MSCK_2020	exon	1796512	1797224	.	-	0	transcript_id "MSTRG.4768.1"; gene_id "MSTRG.4768"; gene_name "MSTRG.4768"; transcript_type "novel"; gene_type "novel";
Ca22chr4A_C_albicans_SC5314	MSCK_2020	exon	83606	83932	.	-	0	transcript_id "MSTRG.5225.1"; gene_id "MSTRG.5225"; gene_name "MSTRG.5225"; transcript_type "novel"; gene_type "novel";
Ca22chr4A_C_albicans_SC5314	MSCK_2020	exon	781552	781959	.	+	0	transcript_id "MSTRG.5506.1"; gene_id "MSTRG.5506"; gene_name "MSTRG.5506"; transcript_type "novel"; gene_type "novel";
Ca22chr4A_C_albicans_SC5314	MSCK_2020	exon	1247955	1248179	.	-	0	transcript_id "MSTRG.5693.1"; gene_id "MSTRG.5693"; gene_name "MSTRG.5693"; transcript_type "novel"; gene_type "novel";
Ca22chr4A_C_albicans_SC5314	MSCK_2020	exon	1602252	1602648	.	+	0	transcript_id "MSTRG.5848.1"; gene_id "MSTRG.5848"; gene_name "MSTRG.5848"; transcript_type "novel"; gene_type "novel";
Ca22chr4B_C_albicans_SC5314	MSCK_2020	exon	1456627	1456869	.	+	0	transcript_id "MSTRG.6460.1"; gene_id "MSTRG.6460"; gene_name "MSTRG.6460"; transcript_type "novel"; gene_type "novel";
Ca22chr5A_C_albicans_SC5314	MSCK_2020	exon	256334	256550	.	-	0	transcript_id "MSTRG.6630.1"; gene_id "MSTRG.6630"; gene_name "MSTRG.6630"; transcript_type "novel"; gene_type "novel";
Ca22chr5A_C_albicans_SC5314	MSCK_2020	exon	1118061	1118380	.	+	0	transcript_id "MSTRG.6996.1"; gene_id "MSTRG.6996"; gene_name "MSTRG.6996"; transcript_type "novel"; gene_type "novel";
Ca22chr5A_C_albicans_SC5314	MSCK_2020	exon	1180953	1181075	.	+	0	transcript_id "MSTRG.7036.2"; gene_id "MSTRG.7036"; gene_name "MSTRG.7036"; transcript_type "novel"; gene_type "novel";
Ca22chr5A_C_albicans_SC5314	MSCK_2020	exon	1181256	1181617	.	+	0	transcript_id "MSTRG.7036.2"; gene_id "MSTRG.7036"; gene_name "MSTRG.7036"; transcript_type "novel"; gene_type "novel";
Ca22chr5A_C_albicans_SC5314	MSCK_2020	exon	1180959	1181075	.	+	0	transcript_id "MSTRG.7036.3"; gene_id "MSTRG.7036"; gene_name "MSTRG.7036"; transcript_type "novel"; gene_type "novel";
Ca22chr5A_C_albicans_SC5314	MSCK_2020	exon	1181267	1181585	.	+	0	transcript_id "MSTRG.7036.3"; gene_id "MSTRG.7036"; gene_name "MSTRG.7036"; transcript_type "novel"; gene_type "novel";
Ca22chr6A_C_albicans_SC5314	MSCK_2020	exon	223430	223447	.	+	0	transcript_id "MSTRG.7517.1"; gene_id "MSTRG.7517"; gene_name "MSTRG.7517"; transcript_type "novel"; gene_type "novel";
Ca22chr6A_C_albicans_SC5314	MSCK_2020	exon	223618	223961	.	+	0	transcript_id "MSTRG.7517.1"; gene_id "MSTRG.7517"; gene_name "MSTRG.7517"; transcript_type "novel"; gene_type "novel";
Ca22chr6A_C_albicans_SC5314	MSCK_2020	exon	435469	435784	.	-	0	transcript_id "MSTRG.7608.1"; gene_id "MSTRG.7608"; gene_name "MSTRG.7608"; transcript_type "novel"; gene_type "novel";
Ca22chr6A_C_albicans_SC5314	MSCK_2020	exon	1031751	1032015	.	-	0	transcript_id "MSTRG.7847.1"; gene_id "MSTRG.7847"; gene_name "MSTRG.7847"; transcript_type "novel"; gene_type "novel";
Ca22chr6B_C_albicans_SC5314	MSCK_2020	exon	156912	157205	.	+	0	transcript_id "MSTRG.7906.1"; gene_id "MSTRG.7906"; gene_name "MSTRG.7906"; transcript_type "novel"; gene_type "novel";
Ca22chr6B_C_albicans_SC5314	MSCK_2020	exon	217117	217350	.	-	0	transcript_id "MSTRG.7936.1"; gene_id "MSTRG.7936"; gene_name "MSTRG.7936"; transcript_type "novel"; gene_type "novel";
Ca22chr7A_C_albicans_SC5314	MSCK_2020	exon	110720	111447	.	-	0	transcript_id "MSTRG.8245.6"; gene_id "MSTRG.8245"; gene_name "MSTRG.8245"; transcript_type "novel"; gene_type "novel";
Ca22chr7A_C_albicans_SC5314	MSCK_2020	exon	111537	111610	.	-	0	transcript_id "MSTRG.8245.6"; gene_id "MSTRG.8245"; gene_name "MSTRG.8245"; transcript_type "novel"; gene_type "novel";
Ca22chr7A_C_albicans_SC5314	MSCK_2020	exon	168926	169383	.	-	0	transcript_id "MSTRG.8305.1"; gene_id "MSTRG.8305"; gene_name "MSTRG.8305"; transcript_type "novel"; gene_type "novel";
Ca22chr7A_C_albicans_SC5314	MSCK_2020	exon	184921	185252	.	-	0	transcript_id "MSTRG.8309.1"; gene_id "MSTRG.8309"; gene_name "MSTRG.8309"; transcript_type "novel"; gene_type "novel";
Ca22chr7A_C_albicans_SC5314	MSCK_2020	exon	770312	770576	.	+	0	transcript_id "MSTRG.8537.1"; gene_id "MSTRG.8537"; gene_name "MSTRG.8537"; transcript_type "novel"; gene_type "novel";
Ca22chrRA_C_albicans_SC5314	MSCK_2020	exon	7596	8350	.	-	0	transcript_id "MSTRG.8766.2"; gene_id "MSTRG.8766"; gene_name "MSTRG.8766"; transcript_type "novel"; gene_type "novel";
Ca22chrRA_C_albicans_SC5314	MSCK_2020	exon	8405	8527	.	-	0	transcript_id "MSTRG.8766.2"; gene_id "MSTRG.8766"; gene_name "MSTRG.8766"; transcript_type "novel"; gene_type "novel";
Ca22chrRA_C_albicans_SC5314	MSCK_2020	exon	7596	8193	.	-	0	transcript_id "MSTRG.8766.3"; gene_id "MSTRG.8766"; gene_name "MSTRG.8766"; transcript_type "novel"; gene_type "novel";
Ca22chrRA_C_albicans_SC5314	MSCK_2020	exon	8253	8350	.	-	0	transcript_id "MSTRG.8766.3"; gene_id "MSTRG.8766"; gene_name "MSTRG.8766"; transcript_type "novel"; gene_type "novel";
Ca22chrRA_C_albicans_SC5314	MSCK_2020	exon	8405	8490	.	-	0	transcript_id "MSTRG.8766.3"; gene_id "MSTRG.8766"; gene_name "MSTRG.8766"; transcript_type "novel"; gene_type "novel";
Ca22chrRA_C_albicans_SC5314	MSCK_2020	exon	7596	8350	.	-	0	transcript_id "MSTRG.8766.4"; gene_id "MSTRG.8766"; gene_name "MSTRG.8766"; transcript_type "novel"; gene_type "novel";
Ca22chrRA_C_albicans_SC5314	MSCK_2020	exon	8409	8490	.	-	0	transcript_id "MSTRG.8766.4"; gene_id "MSTRG.8766"; gene_name "MSTRG.8766"; transcript_type "novel"; gene_type "novel";
Ca22chrRA_C_albicans_SC5314	MSCK_2020	exon	204207	204425	.	-	0	transcript_id "MSTRG.8853.1"; gene_id "MSTRG.8853"; gene_name "MSTRG.8853"; transcript_type "novel"; gene_type "novel";
Ca22chrRA_C_albicans_SC5314	MSCK_2020	exon	1120679	1121024	.	+	0	transcript_id "MSTRG.9256.1"; gene_id "MSTRG.9256"; gene_name "MSTRG.9256"; transcript_type "novel"; gene_type "novel";
Ca22chrRA_C_albicans_SC5314	MSCK_2020	exon	1422279	1422819	.	+	0	transcript_id "MSTRG.9377.6"; gene_id "MSTRG.9377"; gene_name "MSTRG.9377"; transcript_type "novel"; gene_type "novel";
Ca22chrRA_C_albicans_SC5314	MSCK_2020	exon	1423423	1424261	.	+	0	transcript_id "MSTRG.9377.6"; gene_id "MSTRG.9377"; gene_name "MSTRG.9377"; transcript_type "novel"; gene_type "novel";
Ca22chrRA_C_albicans_SC5314	MSCK_2020	exon	1884764	1885311	.	+	0	transcript_id "MSTRG.9573.1"; gene_id "MSTRG.9573"; gene_name "MSTRG.9573"; transcript_type "novel"; gene_type "novel";
Ca22chrRA_C_albicans_SC5314	MSCK_2020	exon	2009420	2009590	.	-	0	transcript_id "MSTRG.9605.2"; gene_id "MSTRG.9605"; gene_name "MSTRG.9605"; transcript_type "novel"; gene_type "novel";
Ca22chrRA_C_albicans_SC5314	MSCK_2020	exon	2011900	2012657	.	-	0	transcript_id "MSTRG.9605.2"; gene_id "MSTRG.9605"; gene_name "MSTRG.9605"; transcript_type "novel"; gene_type "novel";
Ca22chrRA_C_albicans_SC5314	MSCK_2020	exon	1999057	1999493	.	+	0	transcript_id "MSTRG.9626.1"; gene_id "MSTRG.9626"; gene_name "MSTRG.9626"; transcript_type "novel"; gene_type "novel";
Ca22chrRA_C_albicans_SC5314	MSCK_2020	exon	2009551	2010652	.	+	0	transcript_id "MSTRG.9632.1"; gene_id "MSTRG.9632"; gene_name "MSTRG.9632"; transcript_type "novel"; gene_type "novel";
Ca22chrRA_C_albicans_SC5314	MSCK_2020	exon	2076202	2076927	.	+	0	transcript_id "MSTRG.9666.1"; gene_id "MSTRG.9666"; gene_name "MSTRG.9666"; transcript_type "novel"; gene_type "novel";
Ca22chrRA_C_albicans_SC5314	MSCK_2020	exon	2083265	2083724	.	+	0	transcript_id "MSTRG.9668.1"; gene_id "MSTRG.9668"; gene_name "MSTRG.9668"; transcript_type "novel"; gene_type "novel";
Ca22chrRA_C_albicans_SC5314	MSCK_2020	exon	2083278	2083394	.	+	0	transcript_id "MSTRG.9668.2"; gene_id "MSTRG.9668"; gene_name "MSTRG.9668"; transcript_type "novel"; gene_type "novel";
Ca22chrRA_C_albicans_SC5314	MSCK_2020	exon	2083523	2083725	.	+	0	transcript_id "MSTRG.9668.2"; gene_id "MSTRG.9668"; gene_name "MSTRG.9668"; transcript_type "novel"; gene_type "novel";
Ca22chrRA_C_albicans_SC5314	MSCK_2020	exon	2085614	2086251	.	+	0	transcript_id "MSTRG.9669.1"; gene_id "MSTRG.9669"; gene_name "MSTRG.9669"; transcript_type "novel"; gene_type "novel";
Ca22chrRA_C_albicans_SC5314	MSCK_2020	exon	2240255	2240628	.	-	0	transcript_id "MSTRG.9734.1"; gene_id "MSTRG.9734"; gene_name "MSTRG.9734"; transcript_type "novel"; gene_type "novel";
Ca22chrRB_C_albicans_SC5314	MSCK_2020	exon	611067	611540	.	+	0	transcript_id "MSTRG.9895.1"; gene_id "MSTRG.9895"; gene_name "MSTRG.9895"; transcript_type "novel"; gene_type "novel";
Ca22chrRB_C_albicans_SC5314	MSCK_2020	exon	624215	624446	.	-	0	transcript_id "MSTRG.9904.1"; gene_id "MSTRG.9904"; gene_name "MSTRG.9904"; transcript_type "novel"; gene_type "novel";
Ca22chrRB_C_albicans_SC5314	MSCK_2020	exon	1371132	1371340	.	-	0	transcript_id "MSTRG.10192.1"; gene_id "MSTRG.10192"; gene_name "MSTRG.10192"; transcript_type "novel"; gene_type "novel";
